# Supplementary material
Source: PubMed Central journal article supplement (PMC3258925)
Supplement: supp_M802703200_Table_1_supplemental_file.pdf [file supp_M802703200_Table_1_supplemental_file.pdf]

**Table 1**  
**The recombinant FV variants; primers and restriction enzymes used.**

| Mutant                                | Template          | Primer                                                              | Enzymes              |
|---------------------------------------|-------------------|---------------------------------------------------------------------|----------------------|
| R316A/H318A                           | WT-FV             | 5'-GTG AGC AGG <b>CGC</b> GGG CCA TGA AGA GG-3'                     | -                    |
| <b><u>R316A/H318A/R400A</u></b>       | R316A/H318A       | 5'- TCA GAG CCC AGG TCG <b>CAG</b> ACA CAC TC-3'                    | Xcm/Bsu 36I (0.5 kb) |
| <b><u>K320A/R321A/E323A</u></b>       | WT-FV             | 5'-GGC ACA TGG <b>CGG</b> CGT GGG CAT TCA TTG C-3'                  | Xcm/Bsu 36I (0.5 kb) |
| E329A/E330A                           | WT-FV             | 5'-TCA TTG CTG CAG <b>CGG</b> CAG TCA TTT GGG-3'                    | Xcm/Bsu 36I (0.5 kb) |
| <b><u>E329A/E330A/K379A</u></b>       | E329A/E330A       | 5'-GAT GAG TCC TTC ACC AAA <b>GCT</b> ACA GTG AAT CCC-3'            | Xcm/Bsu 36I (0.5 kb) |
| K386A                                 | WT-FV             | 5'-GTG AAT CCC AAT ATG <b>GCA</b> GAA GAT GGG ATT TTG GG-3'         | -                    |
| <b><u>K386A/R652A/K655A</u></b>       | K386A             | 5'-GCT GAA ATT <b>CGC</b> GGA TGT <b>TGC</b> ATG TAT CCC AG -3'     | Xcm/BspEI (2.5 kb)   |
| E461A/E467A                           | WT-FV             | 5'-AAC ATC TTA <b>GCG</b> TTT GAT GAA CCC ACA GCA AAT GAT GCC C-3'  | -                    |
| <b><u>E461A/E467A/K499A</u></b>       | E461A/E467A       | 5'-CTT CTA ATC TGT <b>GCG</b> AGC AGA TCC CTG G-3'                  | Bsu 36I/BspEI (2 kb) |
| <b><u>R501A</u></b>                   | WT-FV             | 5'-CTG TAA GAG <b>CGC</b> ATC CCT GGA CAG G-3'                      | Bln1/Bsu 36I (2 kb)  |
| <b><u>R510A</u></b>                   | WT-FV             | 5'-CGA GGA ATA CAG <b>GCG</b> GCA GCA GAC ATC G-3'                  | Bln1/Bsu 36I (2 kb)  |
| <b><u>A511D</u></b>                   | WT-FV             | 5'-GGA ATA CAG AGG <b>GAC</b> GCA GAC ATC GAA CAG C-3'              | Bln1/Bsu 36I (2 kb)  |
| <b><u>R501A/R510A/A511D</u></b>       | R501A             | 5'-AGG AAT ACA <b>GGC</b> GGA <b>CGC</b> AGA CAT CG-3'              | Bsu 36I/BspEI (2 kb) |
| <b><u>D513A</u></b>                   | WT-FV             | 5'-AGG GCA GCA GCC ATC GAA CAG CAG GC-3'                            | -                    |
| <b><u>R501A/R510A/A511D/D513A</u></b> | R501A/R510A/A511D | 5'-CAG GCG GAC GCA GCC ATC GAA CAG CAG GC-3'                        | Bsu 36I/BspEI (2 kb) |
| <b><u>D513A/D577A/D578A</u></b>       | D513A             | 5'-GAT TCT GCT TTG CTG CCA CTG TCC AGT GG-3'                        | Bsu 36I/BspEI (2 kb) |
| <b><u>D577A/D578A</u></b>             | WT-FV             | 5'-GAT TCT GCT TTG CTG CCA CTG TCC AGT GG-3'                        | Bsu 36I/BspEI (2 kb) |
| R1551A                                | WT-FV             | 5'-CGC AGC AAC AAT GGA AAC <b>GCA</b> AGA AAT TAT TAC ATT GCT GC-3' | -                    |
| R1551A/H1683E                         | R1551A            | 5'-TAT ACC TAC GTA TGG <b>GAG</b> GCC ACT GAG CG-3'                 | -                    |
| <b><u>R1551A/ E1650A/H1683E</u></b>   | R1551A/H1683E     | 5'-CCC ATG GAC TTT CCT ATG <b>CAA</b> AAT CAT CAG AGG G-3'          | Kpn 1 (9kb)          |
| E1650A                                | WT-FV             | 5'-CCC ATG GAC TTT CCT ATG <b>CAA</b> AAT CAT CAG AGG G-3'          | -                    |
| <b><u>E1650A/W1665A</u></b>           | E1650A            | 5'-GAT GAC TCT CCT GAA <b>GCG</b> TTT AAG GAA GAT AAT GCT G-3'      | Kpn 1 (9kb)          |

Sense primers used for mutagenesis and restriction enzymes employed for isolating the fragments containing the mutations, which were then used to replace the corresponding fragment in WT FV cDNA. Changes in nucleotide sequences are in bold, antisense counterpart primers are not shown. The size of each cleaved fragment that was isolated and ligated into the WT FV cDNA lacking the corresponding fragment is shown in brackets. The investigated variants are in bold and underlined.
